# Supplementary material for: Positron scattering from structurally related biomolecules
Source: Royal Society of Chemistry journal article supplement (doi:10.1039/d3ra06227a), 2024-01-01
Supplement: d3ra06227a1.pdf [file d3ra06227a1.pdf]

*Supplemental Material for:*

# Positron Scattering from Structurally Related Biomolecules

Sapna Mahla and Bobby Antony\*

*Department of Physics, Indian Institute of Technology (ISM) Dhanbad, JH 826004, India*

E-mail: [bobby@iitism.ac.in](mailto:bobby@iitism.ac.in)

Table S1:  $Q_{total}$ ,  $Q_{ion}$ ,  $Q_{el}$  and  $Q_{mtcs}$  for positron scattering from  $\text{HCONH}_2$ , in units of  $\text{\AA}^2$ .

| $E(\text{eV})$ | $Q_{total}$ | $Q_{ion}$ | $Q_{el}$ | $Q_{mtcs}$ | $E(\text{eV})$ | $Q_{total}$ | $Q_{ion}$ | $Q_{el}$ | $Q_{mtcs}$ |
|----------------|-------------|-----------|----------|------------|----------------|-------------|-----------|----------|------------|
| 1              | 34.236      | 0         | 34.236   | 55.75683   | 90             | 16.789      | 7.701     | 5.808    | 2.43256    |
| 2              | 26.714      | 0         | 26.714   | 38.71197   | 100            | 15.778      | 7.406     | 5.459    | 2.14733    |
| 3              | 23.148      | 0         | 23.148   | 30.78365   | 120            | 14.167      | 6.893     | 4.908    | 1.73875    |
| 4              | 22.878      | 0         | 20.588   | 26.04567   | 140            | 12.931      | 6.464     | 4.491    | 1.44034    |
| 5              | 27.302      | 0         | 17.87    | 22.82853   | 160            | 11.938      | 6.099     | 4.158    | 1.21126    |
| 6              | 31.732      | 0         | 16.159   | 20.46533   | 180            | 11.126      | 5.782     | 3.884    | 1.04506    |
| 7              | 35.08       | 0         | 15.324   | 18.63542   | 200            | 10.437      | 5.504     | 3.653    | 0.91854    |
| 8              | 37.358      | 0         | 14.951   | 17.1619    | 250            | 9.091       | 4.933     | 3.199    | 0.70622    |
| 9              | 38.795      | 0         | 14.764   | 15.94243   | 300            | 8.095       | 4.485     | 2.862    | 0.57708    |
| 10             | 39.609      | 0         | 14.651   | 14.90936   | 350            | 7.32        | 4.12      | 2.598    | 0.49162    |
| 11             | 39.976      | 0.031     | 14.55    | 14.02047   | 400            | 6.695       | 3.815     | 2.387    | 0.42804    |
| 12             | 40.024      | 0.25      | 14.432   | 13.24324   | 450            | 6.18        | 3.557     | 2.211    | 0.37389    |
| 13             | 39.851      | 0.695     | 14.291   | 12.55599   | 500            | 5.742       | 3.331     | 2.062    | 0.33221    |
| 14             | 39.526      | 1.309     | 14.127   | 11.94298   | 600            | 5.047       | 2.964     | 1.824    | 0.27192    |
| 15             | 39.096      | 2.02      | 13.946   | 11.39163   | 700            | 4.514       | 2.673     | 1.642    | 0.23144    |
| 16             | 38.593      | 2.767     | 13.749   | 10.89201   | 800            | 4.093       | 2.436     | 1.499    | 0.20027    |
| 17             | 38.045      | 3.509     | 13.542   | 10.43644   | 900            | 3.746       | 2.239     | 1.379    | 0.17421    |
| 18             | 37.469      | 4.217     | 13.329   | 10.01883   | 1000           | 3.454       | 2.068     | 1.281    | 0.1529     |
| 19             | 36.88       | 4.875     | 13.115   | 9.63424    | 1500           | 2.521       | 1.515     | 0.957    | 0.08723    |
| 20             | 36.285      | 5.476     | 12.899   | 9.27866    | 2000           | 1.999       | 1.196     | 0.776    | 0.05848    |
| 30             | 30.793      | 8.684     | 10.902   | 6.77829    | 2500           | 1.664       | 0.989     | 0.658    | 0.04409    |
| 40             | 26.652      | 9.265     | 9.372    | 5.33534    | 3000           | 1.428       | 0.84      | 0.576    | 0.03589    |
| 50             | 23.591      | 9.104     | 8.241    | 4.40342    | 3500           | 1.252       | 0.729     | 0.515    | 0.03157    |
| 60             | 21.267      | 8.757     | 7.394    | 3.75897    | 4000           | 1.118       | 0.644     | 0.468    | 0.02718    |
| 70             | 19.451      | 8.382     | 6.744    | 3.25427    | 4500           | 1.014       | 0.577     | 0.432    | 0.02483    |
| 80             | 17.991      | 8.027     | 6.228    | 2.79833    | 5000           | 0.931       | 0.521     | 0.406    | 0.02655    |

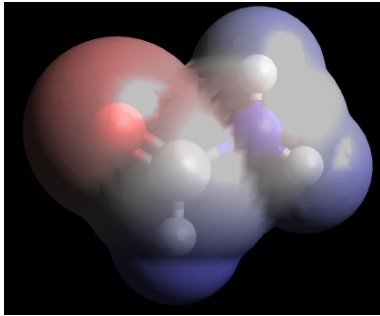

(a) Electrostatic Potential Surface (EPS)

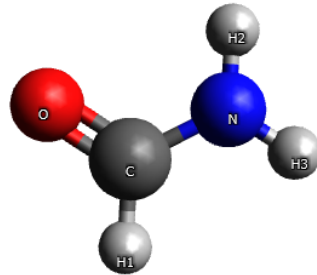

(b) Molecular geometry

Figure S1: Structures of  $\text{HCONH}_2$

Table S2:  $Q_{ps}$  and  $Q_{exc}$  for positron scattering from HCONH<sub>2</sub>, in units of Å<sup>2</sup>.

| $E(eV)$ | $Q_{ps}$ | $Q_{exc}$ | $E(eV)$ | $Q_{ps}$ | $Q_{exc}$ | $E(eV)$ | $Q_{ps}$ | $Q_{exc}$ |
|---------|----------|-----------|---------|----------|-----------|---------|----------|-----------|
| 1       | 0        | 0         | 19      | 15.036   | 3.854     | 400     | 0        | 0.493     |
| 2       | 0        | 0         | 20      | 13.927   | 3.983     | 450     | 0        | 0.412     |
| 3       | 0        | 0         | 30      | 7.002    | 4.205     | 500     | 0        | 0.349     |
| 4       | 2.29     | 0         | 40      | 4.045    | 3.97      | 600     | 0        | 0.259     |
| 5       | 9.432    | 0         | 50      | 2.556    | 3.69      | 700     | 0        | 0.199     |
| 6       | 15.573   | 0         | 60      | 1.704    | 3.412     | 800     | 0        | 0.158     |
| 7       | 19.756   | 0         | 70      | 1.177    | 3.148     | 900     | 0        | 0.128     |
| 8       | 22.407   | 0         | 80      | 0.833    | 2.903     | 1000    | 0        | 0.105     |
| 9       | 24.028   | 0.003     | 90      | 0.6      | 2.68      | 1500    | 0        | 0.049     |
| 10      | 24.955   | 0.003     | 100     | 0.436    | 2.477     | 2000    | 0        | 0.027     |
| 11      | 25.156   | 0.239     | 120     | 0.237    | 2.129     | 2500    | 0        | 0.017     |
| 12      | 24.469   | 0.873     | 140     | 0.132    | 1.844     | 3000    | 0        | 0.012     |
| 13      | 23.292   | 1.573     | 160     | 0.072    | 1.609     | 3500    | 0        | 0.008     |
| 14      | 21.888   | 2.202     | 180     | 0.044    | 1.416     | 4000    | 0        | 0.006     |
| 15      | 20.411   | 2.719     | 200     | 0.025    | 1.255     | 4500    | 0        | 0.005     |
| 16      | 18.95    | 3.127     | 250     | 0.006    | 0.953     | 5000    | 0        | 0.004     |
| 17      | 17.552   | 3.442     | 300     | 0.001    | 0.747     |         |          |           |
| 18      | 16.245   | 3.678     | 350     | 0.001    | 0.601     |         |          |           |

Table S3:  $Q_{ps}$  and  $Q_{exc}$  for positron scattering from HCOPH<sub>2</sub>, in units of Å<sup>2</sup>.

| $E(eV)$ | $Q_{ps}$ | $Q_{exc}$ | $E(eV)$ | $Q_{ps}$ | $Q_{exc}$ | $E(eV)$ | $Q_{ps}$ | $Q_{exc}$ |
|---------|----------|-----------|---------|----------|-----------|---------|----------|-----------|
| 1       | 0        | 0         | 19      | 15.417   | 5.026     | 400     | 0        | 0.468     |
| 2       | 0        | 0         | 20      | 14.074   | 5.116     | 450     | 0        | 0.389     |
| 3       | 0.918    | 0         | 30      | 6.335    | 4.995     | 500     | 0        | 0.327     |
| 4       | 11.047   | 0         | 40      | 3.393    | 4.542     | 600     | 0        | 0.24      |
| 5       | 20.208   | 0         | 50      | 2.008    | 4.116     | 700     | 0        | 0.183     |
| 6       | 25.904   | 0         | 60      | 1.255    | 3.734     | 800     | 0        | 0.144     |
| 7       | 29.104   | 0         | 70      | 0.808    | 3.395     | 900     | 0        | 0.116     |
| 8       | 30.784   | 0         | 80      | 0.534    | 3.093     | 1000    | 0        | 0.095     |
| 9       | 31.558   | 0.003     | 90      | 0.357    | 2.826     | 1500    | 0        | 0.043     |
| 10      | 31.672   | 0.119     | 100     | 0.241    | 2.59      | 2000    | 0        | 0.023     |
| 11      | 30.616   | 0.878     | 120     | 0.112    | 2.194     | 2500    | 0        | 0.014     |
| 12      | 28.819   | 1.835     | 140     | 0.054    | 1.878     | 3000    | 0        | 0.01      |
| 13      | 26.705   | 2.711     | 160     | 0.025    | 1.624     | 3500    | 0        | 0.007     |
| 14      | 24.518   | 3.427     | 180     | 0.013    | 1.417     | 4000    | 0        | 0.005     |
| 15      | 22.393   | 3.978     | 200     | 0.004    | 1.247     | 4500    | 0        | 0.004     |
| 16      | 20.402   | 4.386     | 250     | 0.001    | 0.933     | 5000    | 0        | 0.003     |
| 17      | 18.574   | 4.68      | 300     | 0.001    | 0.722     |         |          |           |
| 18      | 16.913   | 4.886     | 350     | 0        | 0.576     |         |          |           |

Table S4:  $Q_{total}$ ,  $Q_{ion}$ ,  $Q_{el}$  and  $Q_{mtcs}$  for positron scattering from HCOPH<sub>2</sub>, in units of Å<sup>2</sup>.

| $E(eV)$ | $Q_{total}$ | $Q_{ion}$ | $Q_{el}$ | $Q_{mtcs}$ | $E(eV)$ | $Q_{total}$ | $Q_{ion}$ | $Q_{el}$ | $Q_{mtcs}$ |
|---------|-------------|-----------|----------|------------|---------|-------------|-----------|----------|------------|
| 1       | 45.903      | 0         | 45.903   | 71.71248   | 90      | 20.259      | 9.599     | 7.477    | 2.73285    |
| 2       | 35.079      | 0         | 35.079   | 47.72947   | 100     | 19.12       | 9.217     | 7.072    | 2.51273    |
| 3       | 31.033      | 0         | 30.115   | 37.36029   | 120     | 17.28       | 8.561     | 6.413    | 2.15531    |
| 4       | 36.321      | 0         | 25.274   | 31.39367   | 140     | 15.84       | 8.017     | 5.891    | 1.85992    |
| 5       | 42.491      | 0         | 22.283   | 27.42519   | 160     | 14.67       | 7.554     | 5.467    | 1.61715    |
| 6       | 46.802      | 0         | 20.898   | 24.54335   | 180     | 13.697      | 7.154     | 5.113    | 1.43088    |
| 7       | 49.377      | 0         | 20.273   | 22.32571   | 200     | 12.865      | 6.804     | 4.81     | 1.28317    |
| 8       | 50.708      | 0         | 19.924   | 20.54638   | 250     | 11.238      | 6.084     | 4.22     | 1.01384    |
| 9       | 51.205      | 0         | 19.644   | 19.07608   | 300     | 10.029      | 5.52      | 3.786    | 0.83792    |
| 10      | 51.164      | 0.01      | 19.363   | 17.83172   | 350     | 9.09        | 5.065     | 3.449    | 0.7159     |
| 11      | 50.777      | 0.221     | 19.062   | 16.76091   | 400     | 8.333       | 4.684     | 3.181    | 0.62082    |
| 12      | 50.174      | 0.777     | 18.743   | 15.82472   | 450     | 7.711       | 4.364     | 2.958    | 0.54211    |
| 13      | 49.438      | 1.611     | 18.411   | 14.99684   | 500     | 7.186       | 4.086     | 2.773    | 0.48       |
| 14      | 48.638      | 2.607     | 18.086   | 13.96395   | 600     | 6.35        | 3.635     | 2.475    | 0.38847    |
| 15      | 47.796      | 3.665     | 17.76    | 12.91962   | 700     | 5.708       | 3.278     | 2.247    | 0.32439    |
| 16      | 46.931      | 4.714     | 17.429   | 12.01359   | 800     | 5.199       | 2.989     | 2.066    | 0.2778     |
| 17      | 46.059      | 5.708     | 17.097   | 11.22407   | 900     | 4.785       | 2.751     | 1.918    | 0.24176    |
| 18      | 45.19       | 6.624     | 16.767   | 10.53289   | 1000    | 4.434       | 2.546     | 1.793    | 0.21235    |
| 19      | 44.331      | 7.448     | 16.44    | 9.92486    | 1500    | 3.297       | 1.876     | 1.378    | 0.12012    |
| 20      | 43.49       | 8.18      | 16.12    | 9.38734    | 2000    | 2.651       | 1.49      | 1.138    | 0.07756    |
| 30      | 36.36       | 11.654    | 13.376   | 6.2449     | 2500    | 2.228       | 1.236     | 0.978    | 0.05556    |
| 40      | 31.397      | 11.98     | 11.482   | 4.85588    | 3000    | 1.927       | 1.053     | 0.864    | 0.04293    |
| 50      | 27.877      | 11.571    | 10.182   | 4.09088    | 3500    | 1.699       | 0.914     | 0.778    | 0.03612    |
| 60      | 25.263      | 11.031    | 9.243    | 3.6157     | 4000    | 1.525       | 0.809     | 0.711    | 0.03048    |
| 70      | 23.233      | 10.505    | 8.525    | 3.28504    | 4500    | 1.386       | 0.724     | 0.658    | 0.02745    |
| 80      | 21.604      | 10.026    | 7.951    | 2.99368    | 5000    | 1.275       | 0.654     | 0.618    | 0.02907    |

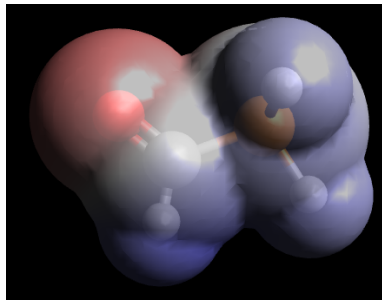

(a) Electrostatic Potential Surface (EPS)

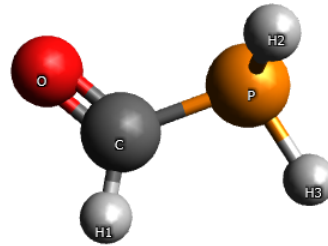

(b) Molecular geometry

Figure S2: Structures of HCOPH<sub>2</sub>

Table S5:  $Q_{total}$ ,  $Q_{ion}$ ,  $Q_{el}$  and  $Q_{mtcs}$  for positron scattering from HCOOH, in units of  $\text{\AA}^2$ .

| $E(\text{eV})$ | $Q_{total}$ | $Q_{ion}$ | $Q_{el}$ | $Q_{mtcs}$ | $E(\text{eV})$ | $Q_{total}$ | $Q_{ion}$ | $Q_{el}$ | $Q_{mtcs}$ |
|----------------|-------------|-----------|----------|------------|----------------|-------------|-----------|----------|------------|
| 1              | 29.439      | 0         | 29.439   | 48.64892   | 90             | 14.538      | 6.653     | 5.127    | 2.52983    |
| 2              | 23.194      | 0         | 23.194   | 34.41716   | 100            | 13.708      | 6.413     | 4.837    | 2.28036    |
| 3              | 20.153      | 0         | 20.153   | 27.60701   | 120            | 12.366      | 5.986     | 4.37     | 1.85237    |
| 4              | 18.284      | 0         | 18.284   | 23.47023   | 140            | 11.322      | 5.623     | 4.012    | 1.52407    |
| 5              | 17.45       | 0         | 16.914   | 20.63263   | 160            | 10.479      | 5.308     | 3.726    | 1.2735     |
| 6              | 19.193      | 0         | 15.401   | 18.53478   | 180            | 9.781       | 5.036     | 3.489    | 1.09207    |
| 7              | 21.579      | 0         | 14.063   | 16.90398   | 200            | 9.192       | 4.798     | 3.289    | 0.95475    |
| 8              | 23.736      | 0         | 13.082   | 15.58755   | 250            | 8.037       | 4.306     | 2.896    | 0.72699    |
| 9              | 25.458      | 0         | 12.413   | 14.49692   | 300            | 7.178       | 3.918     | 2.604    | 0.58988    |
| 10             | 26.749      | 0         | 11.959   | 13.57247   | 350            | 6.507       | 3.605     | 2.374    | 0.49934    |
| 11             | 27.672      | 0         | 11.642   | 12.77734   | 400            | 5.965       | 3.342     | 2.189    | 0.43211    |
| 12             | 28.297      | 0.01      | 11.406   | 12.08235   | 450            | 5.518       | 3.119     | 2.035    | 0.3756     |
| 13             | 28.688      | 0.123     | 11.217   | 11.46824   | 500            | 5.136       | 2.925     | 1.903    | 0.33217    |
| 14             | 28.901      | 0.389     | 11.055   | 10.92106   | 600            | 4.53        | 2.608     | 1.692    | 0.26943    |
| 15             | 28.972      | 0.785     | 10.906   | 10.42946   | 700            | 4.064       | 2.357     | 1.53     | 0.22727    |
| 16             | 28.94       | 1.268     | 10.766   | 9.9845     | 800            | 3.69        | 2.152     | 1.398    | 0.19857    |
| 17             | 28.827      | 1.799     | 10.628   | 9.5792     | 900            | 3.385       | 1.98      | 1.291    | 0.17723    |
| 18             | 28.651      | 2.346     | 10.491   | 9.20808    | 1000           | 3.126       | 1.831     | 1.201    | 0.15976    |
| 19             | 28.431      | 2.886     | 10.356   | 8.86671    | 1500           | 2.297       | 1.35      | 0.904    | 0.09267    |
| 20             | 28.177      | 3.404     | 10.221   | 8.5514     | 2000           | 1.829       | 1.07      | 0.735    | 0.06212    |
| 30             | 25.029      | 6.65      | 8.929    | 6.34283    | 2500           | 1.525       | 0.886     | 0.624    | 0.04673    |
| 40             | 22.165      | 7.549     | 7.861    | 5.06894    | 3000           | 1.316       | 0.757     | 0.549    | 0.03798    |
| 50             | 19.901      | 7.625     | 7.031    | 4.23762    | 3500           | 1.156       | 0.657     | 0.492    | 0.03324    |
| 60             | 18.116      | 7.441     | 6.388    | 3.653      | 4000           | 1.036       | 0.584     | 0.447    | 0.02852    |
| 70             | 16.684      | 7.18      | 5.88     | 3.21645    | 4500           | 0.942       | 0.524     | 0.414    | 0.02604    |
| 80             | 15.515      | 6.911     | 5.469    | 2.84215    | 5000           | 0.866       | 0.474     | 0.389    | 0.02761    |

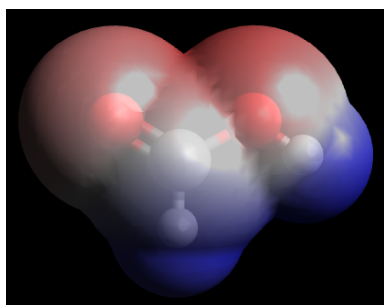

(a) Electrostatic Potential Surface (EPS)

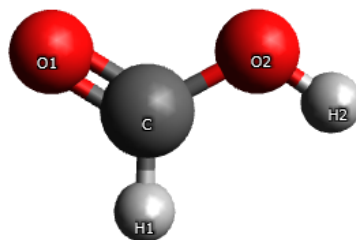

(b) Molecular geometry

Figure S3: Structures of HCOOH

Table S6:  $Q_{ps}$  and  $Q_{exc}$  for positron scattering from HCOOH, in units of  $\text{\AA}^2$ .

| $E(eV)$ | $Q_{ps}$ | $Q_{exc}$ | $E(eV)$ | $Q_{ps}$ | $Q_{exc}$ | $E(eV)$ | $Q_{ps}$ | $Q_{exc}$ |
|---------|----------|-----------|---------|----------|-----------|---------|----------|-----------|
| 1       | 0        | 0         | 19      | 12.407   | 2.782     | 400     | 0        | 0.434     |
| 2       | 0        | 0         | 20      | 11.603   | 2.949     | 450     | 0.001    | 0.363     |
| 3       | 0        | 0         | 30      | 6.073    | 3.377     | 500     | 0        | 0.308     |
| 4       | 0        | 0         | 40      | 3.52     | 3.235     | 600     | 0        | 0.23      |
| 5       | 0.536    | 0         | 50      | 2.212    | 3.033     | 700     | 0        | 0.177     |
| 6       | 3.792    | 0         | 60      | 1.463    | 2.824     | 800     | 0        | 0.14      |
| 7       | 7.516    | 0         | 70      | 1.003    | 2.621     | 900     | 0        | 0.114     |
| 8       | 10.654   | 0         | 80      | 0.704    | 2.431     | 1000    | 0        | 0.094     |
| 9       | 13.042   | 0.003     | 90      | 0.503    | 2.255     | 1500    | 0        | 0.043     |
| 10      | 14.787   | 0.003     | 100     | 0.364    | 2.094     | 2000    | 0        | 0.024     |
| 11      | 16.027   | 0.003     | 120     | 0.198    | 1.812     | 2500    | 0        | 0.015     |
| 12      | 16.773   | 0.108     | 140     | 0.109    | 1.578     | 3000    | 0        | 0.01      |
| 13      | 16.823   | 0.525     | 160     | 0.061    | 1.384     | 3500    | 0        | 0.007     |
| 14      | 16.421   | 1.036     | 180     | 0.034    | 1.222     | 4000    | 0        | 0.005     |
| 15      | 15.758   | 1.523     | 200     | 0.019    | 1.086     | 4500    | 0        | 0.004     |
| 16      | 14.962   | 1.944     | 250     | 0.005    | 0.83      | 5000    | 0        | 0.003     |
| 17      | 14.11    | 2.29      | 300     | 0.002    | 0.654     |         |          |           |
| 18      | 13.248   | 2.566     | 350     | 0        | 0.528     |         |          |           |

Table S7:  $Q_{ps}$  and  $Q_{exc}$  for positron scattering from  $C_2H_5NO$ , in units of  $\text{\AA}^2$ .

| $E(eV)$ | $Q_{ps}$ | $Q_{exc}$ | $E(eV)$ | $Q_{ps}$ | $Q_{exc}$ | $E(eV)$ | $Q_{ps}$ | $Q_{exc}$ |
|---------|----------|-----------|---------|----------|-----------|---------|----------|-----------|
| 1       | 0        | 0         | 19      | 21.81    | 5.87      | 400     | 0        | 0.698     |
| 2       | 0        | 0         | 20      | 20.143   | 6.031     | 450     | 0        | 0.582     |
| 3       | 0        | 0         | 30      | 9.995    | 6.235     | 500     | 0        | 0.492     |
| 4       | 8.335    | 0         | 40      | 5.779    | 5.848     | 600     | 0        | 0.364     |
| 5       | 20.437   | 0         | 50      | 3.671    | 5.41      | 700     | 0        | 0.28      |
| 6       | 28.961   | 0         | 60      | 2.463    | 4.983     | 800     | 0        | 0.222     |
| 7       | 34.136   | 0         | 70      | 1.711    | 4.584     | 900     | 0        | 0.179     |
| 8       | 37.08    | 0         | 80      | 1.215    | 4.217     | 1000    | 0        | 0.147     |
| 9       | 38.629   | 0.004     | 90      | 0.878    | 3.884     | 1500    | 0        | 0.068     |
| 10      | 39.384   | 0.017     | 100     | 0.642    | 3.584     | 2000    | 0        | 0.038     |
| 11      | 38.83    | 0.663     | 120     | 0.352    | 3.069     | 2500    | 0        | 0.024     |
| 12      | 37.173   | 1.715     | 140     | 0.194    | 2.652     | 3000    | 0        | 0.016     |
| 13      | 34.973   | 2.759     | 160     | 0.109    | 2.31      | 3500    | 0        | 0.012     |
| 14      | 32.569   | 3.653     | 180     | 0.063    | 2.029     | 4000    | 0        | 0.009     |
| 15      | 30.153   | 4.369     | 200     | 0.036    | 1.795     | 4500    | 0        | 0.007     |
| 16      | 27.829   | 4.922     | 250     | 0.01     | 1.358     | 5000    | 0        | 0.005     |
| 17      | 25.654   | 5.337     | 300     | 0.002    | 1.062     |         |          |           |
| 18      | 23.646   | 5.646     | 350     | 0.001    | 0.852     |         |          |           |

Table S8:  $Q_{total}$ ,  $Q_{ion}$ ,  $Q_{el}$  and  $Q_{mtcs}$  for positron scattering from  $C_2H_5NO$ , in units of  $\text{\AA}^2$ .

| $E(eV)$ | $Q_{total}$ | $Q_{ion}$ | $Q_{el}$ | $Q_{mtcs}$ | $E(eV)$ | $Q_{total}$ | $Q_{ion}$ | $Q_{el}$ | $Q_{mtcs}$ |
|---------|-------------|-----------|----------|------------|---------|-------------|-----------|----------|------------|
| 1       | 53.208      | 0         | 53.208   | 84.74332   | 90      | 24.303      | 11.088    | 8.453    | 3.17997    |
| 2       | 40.654      | 0         | 40.654   | 56.99274   | 100     | 22.814      | 10.647    | 7.941    | 2.79673    |
| 3       | 34.963      | 0         | 34.963   | 44.7317    | 120     | 20.445      | 9.889     | 7.135    | 2.25423    |
| 4       | 38.298      | 0         | 29.963   | 37.59864   | 140     | 18.63       | 9.262     | 6.522    | 1.86927    |
| 5       | 46.321      | 0         | 25.884   | 32.82961   | 160     | 17.178      | 8.727     | 6.032    | 1.57899    |
| 6       | 52.905      | 0         | 23.944   | 29.359     | 180     | 15.984      | 8.264     | 5.628    | 1.36686    |
| 7       | 57.371      | 0         | 23.235   | 26.68683   | 200     | 14.975      | 7.858     | 5.286    | 1.20442    |
| 8       | 60.106      | 0         | 23.026   | 24.54282   | 250     | 13.004      | 7.025     | 4.611    | 0.93112    |
| 9       | 61.588      | 0         | 22.955   | 22.77191   | 300     | 11.548      | 6.373     | 4.111    | 0.76576    |
| 10      | 62.211      | 0         | 22.81    | 21.27348   | 350     | 10.419      | 5.844     | 3.722    | 0.65646    |
| 11      | 62.234      | 0.124     | 22.617   | 19.98449   | 400     | 9.508       | 5.401     | 3.409    | 0.57561    |
| 12      | 61.862      | 0.598     | 22.376   | 18.85741   | 450     | 8.761       | 5.029     | 3.15     | 0.50804    |
| 13      | 61.223      | 1.404     | 22.087   | 17.8604    | 500     | 8.13        | 4.704     | 2.934    | 0.45474    |
| 14      | 60.413      | 2.428     | 21.763   | 16.97043   | 600     | 7.129       | 4.176     | 2.589    | 0.36635    |
| 15      | 59.498      | 3.559     | 21.417   | 16.16923   | 700     | 6.362       | 3.758     | 2.324    | 0.30552    |
| 16      | 58.516      | 4.711     | 21.054   | 15.44249   | 800     | 5.756       | 3.419     | 2.115    | 0.25728    |
| 17      | 57.501      | 5.827     | 20.683   | 14.77912   | 900     | 5.263       | 3.139     | 1.945    | 0.22224    |
| 18      | 56.472      | 6.871     | 20.309   | 14.17036   | 1000    | 4.846       | 2.897     | 1.802    | 0.19422    |
| 19      | 55.441      | 7.827     | 19.934   | 13.60916   | 1500    | 3.518       | 2.111     | 1.339    | 0.11075    |
| 20      | 54.424      | 8.687     | 19.563   | 13.08971   | 2000    | 2.781       | 1.661     | 1.082    | 0.07442    |
| 30      | 45.541      | 13.041    | 16.27    | 9.24491    | 2500    | 2.307       | 1.369     | 0.914    | 0.05626    |
| 40      | 39.112      | 13.646    | 13.839   | 7.04626    | 3000    | 1.976       | 1.161     | 0.799    | 0.04589    |
| 50      | 34.454      | 13.282    | 12.091   | 5.71434    | 3500    | 1.729       | 1.004     | 0.713    | 0.04054    |
| 60      | 30.96       | 12.706    | 10.808   | 4.81094    | 4000    | 1.543       | 0.886     | 0.648    | 0.03505    |
| 70      | 28.252      | 12.119    | 9.838    | 4.15299    | 4500    | 1.393       | 0.789     | 0.597    | 0.03195    |
| 80      | 26.082      | 11.578    | 9.072    | 3.61718    | 5000    | 1.278       | 0.713     | 0.56     | 0.0344     |

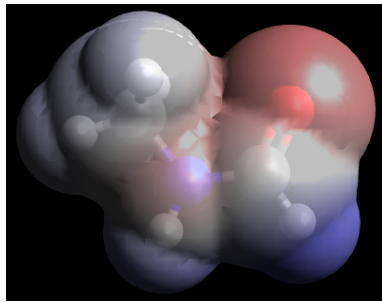

(a) Electrostatic Potential Surface (EPS)

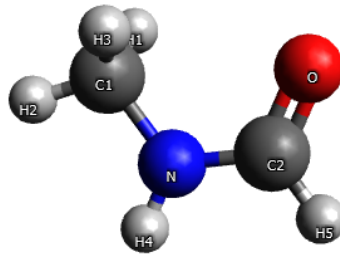

(b) Molecular geometry

Figure S4: Structures of  $C_2H_5NO$

Table S9:  $Q_{total}$ ,  $Q_{ion}$ ,  $Q_{el}$  and  $Q_{mtcs}$  for positron scattering from  $\text{CH}_2\text{O}$ , in units of  $\text{\AA}^2$ .

| $E(\text{eV})$ | $Q_{total}$ | $Q_{ion}$ | $Q_{el}$ | $Q_{mtcs}$ | $E(\text{eV})$ | $Q_{total}$ | $Q_{ion}$ | $Q_{el}$ | $Q_{mtcs}$ |
|----------------|-------------|-----------|----------|------------|----------------|-------------|-----------|----------|------------|
| 1              | 21.158      | 0         | 21.158   | 34.84578   | 90             | 10.831      | 4.929     | 3.834    | 1.57829    |
| 2              | 16.966      | 0         | 16.966   | 24.92176   | 100            | 10.193      | 4.739     | 3.614    | 1.41283    |
| 3              | 14.901      | 0         | 14.901   | 20.08386   | 120            | 9.165       | 4.409     | 3.262    | 1.17175    |
| 4              | 13.625      | 0         | 13.625   | 17.12211   | 140            | 8.369       | 4.129     | 2.991    | 0.98124    |
| 5              | 14.1        | 0         | 12.469   | 15.08007   | 160            | 7.73        | 3.89      | 2.774    | 0.82511    |
| 6              | 16.13       | 0         | 11.267   | 13.56339   | 180            | 7.199       | 3.684     | 2.593    | 0.71079    |
| 7              | 18.159      | 0         | 10.375   | 12.37879   | 200            | 6.752       | 3.503     | 2.439    | 0.62343    |
| 8              | 19.805      | 0         | 9.783    | 11.41814   | 250            | 5.877       | 3.132     | 2.137    | 0.47778    |
| 9              | 21.023      | 0         | 9.407    | 10.61841   | 300            | 5.228       | 2.842     | 1.912    | 0.39057    |
| 10             | 21.879      | 0         | 9.164    | 9.93748    | 350            | 4.725       | 2.607     | 1.736    | 0.33299    |
| 11             | 22.444      | 0         | 8.994    | 9.34902    | 400            | 4.319       | 2.41      | 1.595    | 0.29205    |
| 12             | 22.785      | 0.034     | 8.86     | 8.83251    | 450            | 3.984       | 2.246     | 1.477    | 0.25857    |
| 13             | 22.958      | 0.183     | 8.742    | 8.37423    | 500            | 3.701       | 2.102     | 1.378    | 0.22715    |
| 14             | 23.004      | 0.452     | 8.631    | 7.96425    | 600            | 3.252       | 1.868     | 1.22     | 0.18167    |
| 15             | 22.956      | 0.811     | 8.522    | 7.59453    | 700            | 2.907       | 1.683     | 1.098    | 0.15122    |
| 16             | 22.84       | 1.224     | 8.413    | 7.25872    | 800            | 2.633       | 1.533     | 1        | 0.13046    |
| 17             | 22.672      | 1.659     | 8.303    | 6.95192    | 900            | 2.411       | 1.408     | 0.922    | 0.11494    |
| 18             | 22.466      | 2.096     | 8.191    | 6.67019    | 1000           | 2.223       | 1.302     | 0.855    | 0.10177    |
| 19             | 22.232      | 2.517     | 8.078    | 6.41039    | 1500           | 1.62        | 0.951     | 0.638    | 0.0581     |
| 20             | 21.98       | 2.914     | 7.966    | 6.16988    | 2000           | 1.285       | 0.751     | 0.517    | 0.03886    |
| 30             | 19.217      | 5.255     | 6.881    | 4.477      | 2500           | 1.067       | 0.619     | 0.437    | 0.02923    |
| 40             | 16.852      | 5.799     | 5.992    | 3.51041    | 3000           | 0.917       | 0.527     | 0.383    | 0.02387    |
| 50             | 15.028      | 5.771     | 5.317    | 2.89764    | 3500           | 0.803       | 0.456     | 0.342    | 0.02092    |
| 60             | 13.616      | 5.584     | 4.807    | 2.4328     | 4000           | 0.718       | 0.403     | 0.311    | 0.01803    |
| 70             | 12.496      | 5.358     | 4.412    | 2.06294    | 4500           | 0.651       | 0.361     | 0.287    | 0.01658    |
| 80             | 11.587      | 5.136     | 4.095    | 1.78839    | 5000           | 0.597       | 0.326     | 0.269    | 0.01774    |

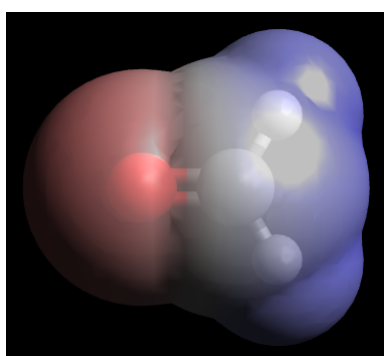

(a) Electrostatic Potential Surface (EPS)

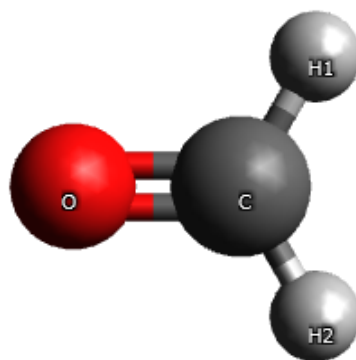

(b) Molecular geometry

Figure S5: Structures of  $\text{CH}_2\text{O}$



Table S10:  $Q_{ps}$  and  $Q_{exc}$  for positron scattering from  $\text{CH}_2\text{O}$ , in units of  $\text{\AA}^2$ .

| $E(\text{eV})$ | $Q_{ps}$ | $Q_{exc}$ | $E(\text{eV})$ | $Q_{ps}$ | $Q_{exc}$ | $E(\text{eV})$ | $Q_{ps}$ | $Q_{exc}$ |
|----------------|----------|-----------|----------------|----------|-----------|----------------|----------|-----------|
| 1              | 0        | 0         | 19             | 9.393    | 2.244     | 400            | 0.001    | 0.313     |
| 2              | 0        | 0         | 20             | 8.743    | 2.357     | 450            | 0        | 0.261     |
| 3              | 0        | 0         | 30             | 4.462    | 2.619     | 500            | 0        | 0.221     |
| 4              | 0        | 0         | 40             | 2.576    | 2.485     | 600            | 0        | 0.164     |
| 5              | 1.631    | 0         | 50             | 1.627    | 2.313     | 700            | 0        | 0.126     |
| 6              | 4.863    | 0         | 60             | 1.084    | 2.141     | 800            | 0        | 0.1       |
| 7              | 7.784    | 0         | 70             | 0.748    | 1.978     | 900            | 0        | 0.081     |
| 8              | 10.022   | 0         | 80             | 0.529    | 1.827     | 1000           | 0        | 0.066     |
| 9              | 11.614   | 0.003     | 90             | 0.379    | 1.689     | 1500           | 0        | 0.031     |
| 10             | 12.713   | 0.002     | 100            | 0.277    | 1.563     | 2000           | 0        | 0.017     |
| 11             | 13.447   | 0.003     | 120            | 0.149    | 1.345     | 2500           | 0        | 0.011     |
| 12             | 13.677   | 0.214     | 140            | 0.082    | 1.167     | 3000           | 0        | 0.007     |
| 13             | 13.439   | 0.594     | 160            | 0.047    | 1.019     | 3500           | 0        | 0.005     |
| 14             | 12.925   | 0.996     | 180            | 0.025    | 0.897     | 4000           | 0        | 0.004     |
| 15             | 12.265   | 1.358     | 200            | 0.014    | 0.796     | 4500           | 0        | 0.003     |
| 16             | 11.542   | 1.661     | 250            | 0.004    | 0.604     | 5000           | 0        | 0.002     |
| 17             | 10.805   | 1.905     | 300            | 0        | 0.474     |                |          |           |
| 18             | 10.083   | 2.096     | 350            | 0.001    | 0.381     |                |          |           |

Table S11:  $Q_{ps}$  and  $Q_{exc}$  for positron scattering from  $\text{CH}_3\text{COCH}_3$ , in units of  $\text{\AA}^2$ .

| $E(\text{eV})$ | $Q_{ps}$ | $Q_{exc}$ | $E(\text{eV})$ | $Q_{ps}$ | $Q_{exc}$ | $E(\text{eV})$ | $Q_{ps}$ | $Q_{exc}$ |
|----------------|----------|-----------|----------------|----------|-----------|----------------|----------|-----------|
| 1              | 0        | 0         | 19             | 22.849   | 6.288     | 400            | 0        | 0.725     |
| 2              | 0        | 0         | 20             | 21.077   | 6.451     | 450            | 0        | 0.604     |
| 3              | 0.127    | 0         | 30             | 10.391   | 6.643     | 500            | 0        | 0.51      |
| 4              | 11.396   | 0         | 40             | 6.005    | 6.219     | 600            | 0        | 0.377     |
| 5              | 24.343   | 0         | 50             | 3.831    | 5.74      | 700            | 0        | 0.289     |
| 6              | 32.841   | 0         | 60             | 2.583    | 5.275     | 800            | 0        | 0.228     |
| 7              | 37.765   | 0         | 70             | 1.804    | 4.842     | 900            | 0        | 0.185     |
| 8              | 40.426   | 0         | 80             | 1.288    | 4.448     | 1000           | 0        | 0.152     |
| 9              | 41.722   | 0.005     | 90             | 0.932    | 4.092     | 1500           | 0        | 0.07      |
| 10             | 42.291   | 0.054     | 100            | 0.681    | 3.772     | 2000           | 0        | 0.039     |
| 11             | 41.423   | 0.842     | 120            | 0.373    | 3.226     | 2500           | 0        | 0.024     |
| 12             | 39.478   | 1.984     | 140            | 0.209    | 2.782     | 3000           | 0        | 0.017     |
| 13             | 37.023   | 3.084     | 160            | 0.119    | 2.421     | 3500           | 0        | 0.012     |
| 14             | 34.393   | 4.014     | 180            | 0.071    | 2.123     | 4000           | 0        | 0.009     |
| 15             | 31.774   | 4.753     | 200            | 0.04     | 1.876     | 4500           | 0        | 0.007     |
| 16             | 29.277   | 5.32      | 250            | 0.009    | 1.417     | 5000           | 0        | 0.005     |
| 17             | 26.947   | 5.745     | 300            | 0.003    | 1.106     |                |          |           |
| 18             | 24.803   | 6.059     | 350            | 0.002    | 0.885     |                |          |           |

Table S12:  $Q_{total}$ ,  $Q_{ion}$ ,  $Q_{el}$  and  $Q_{mtcs}$  for positron scattering from  $\text{CH}_3\text{COCH}_3$ , in units of  $\text{\AA}^2$ .

| $E(\text{eV})$ | $Q_{total}$ | $Q_{ion}$ | $Q_{el}$ | $Q_{mtcs}$ | $E(\text{eV})$ | $Q_{total}$ | $Q_{ion}$ | $Q_{el}$ | $Q_{mtcs}$ |
|----------------|-------------|-----------|----------|------------|----------------|-------------|-----------|----------|------------|
| 1              | 57.262      | 0         | 57.262   | 90.46728   | 90             | 25.795      | 11.654    | 9.117    | 3.00936    |
| 2              | 43.761      | 0         | 43.761   | 60.57685   | 100            | 24.207      | 11.181    | 8.573    | 2.68691    |
| 3              | 37.825      | 0         | 37.698   | 47.5089    | 120            | 21.687      | 10.375    | 7.713    | 2.1834     |
| 4              | 43.255      | 0         | 31.859   | 39.94965   | 140            | 19.751      | 9.705     | 7.055    | 1.8237     |
| 5              | 52.086      | 0         | 27.743   | 34.91063   | 160            | 18.201      | 9.135     | 6.526    | 1.54913    |
| 6              | 58.872      | 0         | 26.031   | 31.24799   | 180            | 16.921      | 8.641     | 6.086    | 1.34678    |
| 7              | 63.279      | 0         | 25.514   | 28.42805   | 200            | 15.841      | 8.212     | 5.713    | 1.19072    |
| 8              | 65.84       | 0         | 25.414   | 26.16404   | 250            | 13.728      | 7.33      | 4.972    | 0.92696    |
| 9              | 67.107      | 0         | 25.381   | 24.29168   | 300            | 12.168      | 6.639     | 4.42     | 0.76759    |
| 10             | 67.509      | 0.003     | 25.161   | 22.70501   | 350            | 10.954      | 6.074     | 3.993    | 0.65636    |
| 11             | 67.312      | 0.178     | 24.869   | 21.33751   | 400            | 9.988       | 5.612     | 3.651    | 0.572      |
| 12             | 66.732      | 0.742     | 24.528   | 20.13943   | 450            | 9.189       | 5.217     | 3.368    | 0.50746    |
| 13             | 65.908      | 1.652     | 24.149   | 19.07734   | 500            | 8.518       | 4.875     | 3.133    | 0.45519    |
| 14             | 64.931      | 2.78      | 23.744   | 18.12703   | 600            | 7.453       | 4.318     | 2.758    | 0.35688    |
| 15             | 63.861      | 4.008     | 23.326   | 17.26946   | 700            | 6.642       | 3.881     | 2.472    | 0.29107    |
| 16             | 62.743      | 5.246     | 22.9     | 16.48966   | 800            | 6           | 3.527     | 2.245    | 0.24485    |
| 17             | 61.597      | 6.435     | 22.47    | 15.77616   | 900            | 5.478       | 3.232     | 2.061    | 0.21138    |
| 18             | 60.45       | 7.544     | 22.044   | 15.11978   | 1000           | 5.042       | 2.981     | 1.909    | 0.1847     |
| 19             | 59.311      | 8.553     | 21.621   | 14.51325   | 1500           | 3.646       | 2.164     | 1.412    | 0.10517    |
| 20             | 58.189      | 9.457     | 21.204   | 13.95048   | 2000           | 2.872       | 1.698     | 1.135    | 0.07066    |
| 30             | 48.557      | 13.96     | 17.563   | 9.57473    | 2500           | 2.378       | 1.397     | 0.957    | 0.05352    |
| 40             | 41.633      | 14.512    | 14.897   | 7.06779    | 3000           | 2.033       | 1.182     | 0.834    | 0.04381    |
| 50             | 36.625      | 14.063    | 12.991   | 5.61613    | 3500           | 1.774       | 1.02      | 0.742    | 0.03886    |
| 60             | 32.887      | 13.415    | 11.614   | 4.646      | 4000           | 1.58        | 0.898     | 0.673    | 0.03371    |
| 70             | 29.995      | 12.769    | 10.58    | 3.94421    | 4500           | 1.426       | 0.799     | 0.62     | 0.03081    |
| 80             | 27.686      | 12.18     | 9.77     | 3.41643    | 5000           | 1.304       | 0.717     | 0.582    | 0.03341    |

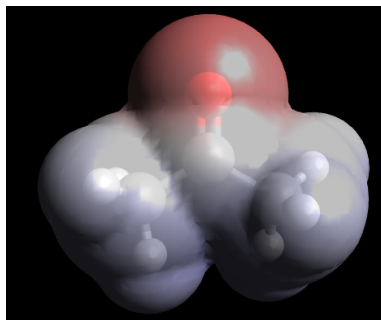

(a) Electrostatic Potential Surface (EPS)

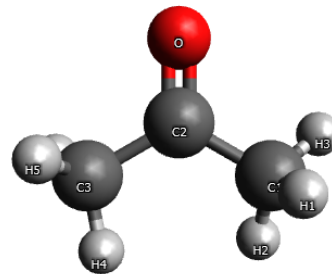

(b) Molecular geometry

Figure S6: Structures of  $\text{CH}_3\text{COCH}_3$

Table S13:  $Q_{total}$ ,  $Q_{ion}$ ,  $Q_{el}$  and  $Q_{mtcs}$  for positron scattering from  $\text{HCOOCH}_3$ , in units of  $\text{\AA}^2$ .

| $E(\text{eV})$ | $Q_{total}$ | $Q_{ion}$ | $Q_{el}$ | $Q_{mtcs}$ | $E(\text{eV})$ | $Q_{total}$ | $Q_{ion}$ | $Q_{el}$ | $Q_{mtcs}$ |
|----------------|-------------|-----------|----------|------------|----------------|-------------|-----------|----------|------------|
| 1              | 47.558      | 0         | 47.558   | 76.540     | 90             | 21.823      | 9.884     | 7.773    | 3.234      |
| 2              | 36.594      | 0         | 36.594   | 52.210     | 100            | 20.538      | 9.507     | 7.327    | 2.923      |
| 3              | 31.538      | 0         | 31.538   | 41.262     | 120            | 18.475      | 8.85      | 6.613    | 2.362      |
| 4              | 28.632      | 0         | 28.508   | 34.831     | 140            | 16.88       | 8.297     | 6.064    | 1.948      |
| 5              | 31.046      | 0         | 25.468   | 30.507     | 160            | 15.596      | 7.822     | 5.625    | 1.638      |
| 6              | 35.62       | 0         | 22.754   | 27.349     | 180            | 14.535      | 7.415     | 5.259    | 1.412      |
| 7              | 39.719      | 0         | 20.971   | 24.912     | 200            | 13.637      | 7.056     | 4.947    | 1.240      |
| 8              | 42.834      | 0         | 19.917   | 22.954     | 250            | 11.879      | 6.319     | 4.333    | 0.953      |
| 9              | 45.025      | 0         | 19.3     | 21.336     | 300            | 10.576      | 5.741     | 3.876    | 0.779      |
| 10             | 46.469      | 0         | 18.857   | 19.966     | 350            | 9.562       | 5.272     | 3.52     | 0.659      |
| 11             | 47.335      | 0.003     | 18.525   | 18.787     | 400            | 8.743       | 4.878     | 3.233    | 0.568      |
| 12             | 47.772      | 0.126     | 18.25    | 17.756     | 450            | 8.071       | 4.548     | 2.995    | 0.500      |
| 13             | 47.898      | 0.508     | 18.001   | 16.844     | 500            | 7.5         | 4.259     | 2.794    | 0.446      |
| 14             | 47.794      | 1.128     | 17.758   | 16.030     | 600            | 6.591       | 3.786     | 2.473    | 0.357      |
| 15             | 47.525      | 1.91      | 17.518   | 15.297     | 700            | 5.895       | 3.414     | 2.225    | 0.297      |
| 16             | 47.139      | 2.781     | 17.277   | 14.631     | 800            | 5.343       | 3.112     | 2.029    | 0.256      |
| 17             | 46.667      | 3.679     | 17.033   | 14.024     | 900            | 4.892       | 2.861     | 1.867    | 0.225      |
| 18             | 46.135      | 4.563     | 16.787   | 13.467     | 1000           | 4.512       | 2.644     | 1.733    | 0.201      |
| 19             | 45.561      | 5.406     | 16.54    | 12.952     | 1500           | 3.291       | 1.935     | 1.294    | 0.116      |
| 20             | 44.964      | 6.19      | 16.295   | 12.476     | 2000           | 2.608       | 1.527     | 1.046    | 0.078      |
| 30             | 38.947      | 10.696    | 14.002   | 8.915      | 2500           | 2.172       | 1.263     | 0.887    | 0.059      |
| 40             | 34.05       | 11.697    | 12.174   | 6.862      | 3000           | 1.865       | 1.074     | 0.776    | 0.048      |
| 50             | 30.322      | 11.603    | 10.794   | 5.606      | 3500           | 1.636       | 0.931     | 0.694    | 0.042      |
| 60             | 27.447      | 11.207    | 9.751    | 4.742      | 4000           | 1.462       | 0.824     | 0.63     | 0.036      |
| 70             | 25.181      | 10.745    | 8.948    | 4.105      | 4500           | 1.325       | 0.737     | 0.582    | 0.033      |
| 80             | 23.346      | 10.298    | 8.304    | 3.618      | 5000           | 1.215       | 0.665     | 0.545    | 0.035      |

Table S14:  $Q_{ps}$  and  $Q_{exc}$  for positron scattering from  $\text{HCOOCH}_3$ , in units of  $\text{\AA}^2$ .

| $E(\text{eV})$ | $Q_{ps}$ | $Q_{exc}$ | $E(\text{eV})$ | $Q_{ps}$ | $Q_{exc}$ | $E(\text{eV})$ | $Q_{ps}$ | $Q_{exc}$ |
|----------------|----------|-----------|----------------|----------|-----------|----------------|----------|-----------|
| 1              | 0        | 0         | 19             | 18.983   | 4.632     | 400            | 0        | 0.632     |
| 2              | 0        | 0         | 20             | 17.644   | 4.835     | 450            | 0        | 0.528     |
| 3              | 0        | 0         | 30             | 8.968    | 5.281     | 500            | 0        | 0.447     |
| 4              | 0.124    | 0         | 40             | 5.166    | 5.013     | 600            | 0        | 0.332     |
| 5              | 5.578    | 0         | 50             | 3.258    | 4.667     | 700            | 0        | 0.256     |
| 6              | 12.866   | 0         | 60             | 2.169    | 4.32      | 800            | 0        | 0.202     |
| 7              | 18.748   | 0         | 70             | 1.498    | 3.99      | 900            | 0        | 0.164     |
| 8              | 22.917   | 0         | 80             | 1.06     | 3.684     | 1000           | 0        | 0.135     |
| 9              | 25.721   | 0.005     | 90             | 0.762    | 3.404     | 1500           | 0        | 0.062     |
| 10             | 27.608   | 0.004     | 100            | 0.554    | 3.15      | 2000           | 0        | 0.035     |
| 11             | 28.755   | 0.052     | 120            | 0.301    | 2.711     | 2500           | 0        | 0.022     |
| 12             | 28.766   | 0.63      | 140            | 0.167    | 2.352     | 3000           | 0        | 0.015     |
| 13             | 27.936   | 1.453     | 160            | 0.094    | 2.055     | 3500           | 0        | 0.011     |
| 14             | 26.641   | 2.267     | 180            | 0.052    | 1.809     | 4000           | 0        | 0.008     |
| 15             | 25.123   | 2.974     | 200            | 0.03     | 1.604     | 4500           | 0        | 0.006     |
| 16             | 23.529   | 3.552     | 250            | 0.007    | 1.22      | 5000           | 0        | 0.005     |
| 17             | 21.946   | 4.009     | 300            | 0.002    | 0.957     |                |          |           |
| 18             | 20.422   | 4.363     | 350            | 0        | 0.77      |                |          |           |

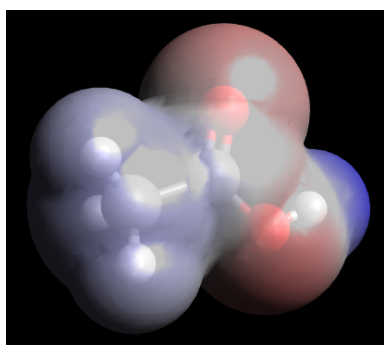

(a) Electrostatic Potential Surface (EPS)

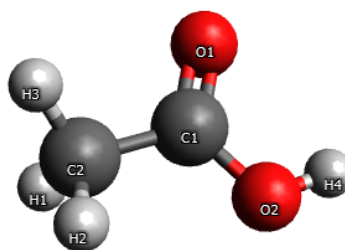

(b) Molecular geometry

Figure S7: Structures of  $\text{HCOOCH}_3$
